# Supplementary material for: Polyphenolic Compounds Analysis of Old and New Apple Cultivars and Contribution of Polyphenolic Profile to the In Vitro Antioxidant Capacity
Source: PubMed Central journal article supplement (PMC5789330; doi:10.3390/antiox7010020), 2018-01-24
Supplement: antioxidants-07-00020-s001.pdf [file antioxidants-07-00020-s001.pdf]

**Table S1.** Calibration characteristics and limits of detection (LOD) and limits of quantification (LOQ) of reference compounds in HPLC-DAD.

| Phenolic Compound         | c (µg/mL) | Calibration Curve Equation | Linearity * | LOD (µg/mL) | LOQ (µg/mL) |
|---------------------------|-----------|----------------------------|-------------|-------------|-------------|
| Procyanidin B1            | 0.5–20    | $y = 9.537x - 1.564$       | 0.9982      | 0.5         | 2.8         |
| (+)-Catechin              | 0.5–50    | $y = 16.083x - 7.072$      | 0.9993      | 0.9         | 2.2         |
| Procyanidin B2            | 0.5–10    | $y = 13.373x - 25.880$     | 0.9996      | 1.2         | 2.5         |
| Procyanidin C1            | 1.0–50    | $y = 12.580x - 38.568$     | 0.9993      | 0.2         | 2.2         |
| (-)-Epicatechin           | 1.0–50    | $y = 15.678x - 1.228$      | 0.9997      | 0.4         | 1.7         |
| Procyanidin A2            | 1.0–50    | $y = 15.207x - 2.578$      | 0.9986      | 0.5         | 1.9         |
| Gallic acid               | 0.5–100   | $y = 74.565x - 203.271$    | 0.9997      | 1.6         | 1.9         |
| Protocatechuic acid       | 0.2–20    | $y = 83.103x + 14.884$     | 0.9998      | 0.3         | 0.9         |
| 5-O-Caffeoylquinic acid   | 0.5–100   | $y = 76.834x - 258.863$    | 0.9994      | 2.9         | 3.1         |
| Caffeic acid              | 0.1–50    | $y = 135.456x + 8.922$     | 0.9998      | 0.5         | 0.6         |
| p-Coumaric acid           | 0.1–10    | $y = 188.341x - 225.984$   | 0.9989      | 0.03        | 0.1         |
| Ferulic acid              | 0.1–10    | $y = 136.140x + 11.868$    | 0.9999      | 0.1         | 0.2         |
| Phloretin-2-O-β-glucoside | 0.2–100   | $y = 55.217x - 34.456$     | 0.9999      | 0.8         | 2.0         |
| Quercetin-3-O-galactoside | 5.0–250   | $y = 76.747x + 113.346$    | 0.9987      | 2.5         | 3.7         |
| Quercetin-3-O-glucoside   | 5.0–100   | $y = 67.725x - 92.729$     | 0.9998      | 0.8         | 2.4         |
| Quercetin-3-O-rutinoside  | 5.0–50    | $y = 51.333x - 21.087$     | 0.9997      | 0.9         | 2.7         |
| Quercetin-3-O-xyloside    | 0.5–100   | $y = 57.714x - 2.109$      | 0.9942      | 0.8         | 2.4         |
| Quercetin-3-O-arabinoside | 5.0–200   | $y = 67.899x - 144.780$    | 0.9993      | 2.7         | 4.2         |
| Quercetin-3-O-rhamnoside  | 5.0–250   | $y = 76.344x - 300.286$    | 0.9997      | 3.4         | 4.7         |
| Quercetin                 | 5.0–100   | $y = 77.325x - 305.333$    | 0.9980      | 5.8         | 7.1         |

\* The linearity was given over the entire 7-point calibration curve. c: concentration; LOD: limit of detection; LOQ: limit of quantification.
